# Supplementary material for: Breast milk alkylglycerols sustain beige adipocytes through adipose tissue macrophages
Source: JCI journal article supplement (doi:10.1172/jci125646), 2019-05-12
Supplement: sd1 [file 1]

301 Moved Permanently

# Moved Permanently

The document has moved here.
